# Supplementary material for: Computational Modeling of the Staphylococcal Enterotoxins and Their Interaction with Natural Antitoxin Compounds
Source: MDPI journal article supplement (doi:10.3390/ijms19010133), 2018-01-03
Supplement: s1 [file s1]

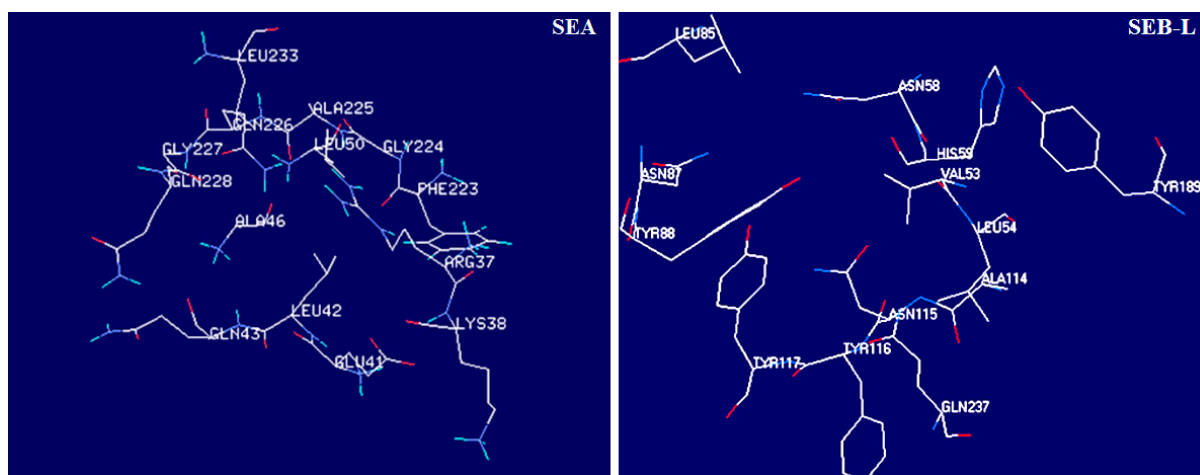

**Supplementary Figure S1.** Amino acids present at the binding sites of the staphylococcal enterotoxin A (SEA) and staphylococcal enterotoxin B-like (SEB-L) as detected by the Computer Atlas of Surface Topology of Proteins (CASTp) are shown.
